# Supplementary material for: Prevalence of Diarrhoeagenic Escherichia coli among Children Aged between 0–36 Months in Peri-Urban Areas of Lusaka
Source: MDPI journal article supplement (doi:10.3390/microorganisms11112790), 2023-11-17
Supplement: s1 [file s1]

**Table S2.** Pathotype combinations in samples with more than one pathotype detected and severity of diarrhoea

| Pathogen Combination      | Total Number of Co-infections | Moderate Diarrhoea | Severe Diarrhoea | P-value |
|---------------------------|-------------------------------|--------------------|------------------|---------|
|                           | n (%)                         | n (%)              | n (%)            |         |
| 2 Pathogens               |                               |                    |                  |         |
| EPEC + ETEC               | 37 (24.1)                     | 37 (100.0)         | 0 (0.0)          | 0.267   |
| EPEC + EAEC               | 51 (33.3)                     | 49 (96.1)          | 2 (3.9)          |         |
| EPEC + EIEC               | 26 (16.9)                     | 26 (100.0)         | 0 (0.0)          |         |
| EPEC + EHEC               | 0 (0.0)                       | 0 (0.0)            | 0 (0.0)          |         |
| ETEC + EAEC               | 20 (13.0)                     | 18 (90.0)          | 2 (10.0)         |         |
| ETEC + EIEC               | 6 (3.9)                       | 6 (100.0)          | 0 (0.0)          |         |
| ETEC + EHEC               | 1 (0.6)                       | 1 (100.00)         | 0 (0.0)          |         |
| EAEC + EIEC               | 10 (6.5)                      | 9 (90.00)          | 1 (10.0)         |         |
| EAEC + EHEC               | 1 (0.6)                       | 1 (100.00)         | 0 (0.0)          |         |
| EIEC + EHEC               | 1 (0.6)                       | 1 (100.00)         | 0 (0.0)          |         |
|                           |                               |                    |                  |         |
| 3 Pathogens               |                               |                    |                  |         |
| EPEC + EAEC + ETEC        | 28 (40.5)                     | 27 (96.4)          | 1 (3.6)          | 1.000   |
| EPEC + EAEC + EIEC        | 16 (23.1)                     | 16 (100.0)         | 0 (0.0)          |         |
| EPEC + EAEC + EHEC        | 0 (0)                         | 0 (0.0)            | 0 (0.0)          |         |
| EPEC + ETEC + EIEC        | 14 (20.2)                     | 14 (100.0)         | 0 (0.0)          |         |
| EPEC + ETEC + EHEC        | 0 (0)                         | 0 (0.0)            | 0 (0.0)          |         |
| EPEC + EIEC + EHEC        | 0 (0)                         | 0 (0.0)            | 0 (0.0)          |         |
| EAEC + ETEC + EIEC        | 9 (13.0)                      | 9 (100.0)          | 0 (0.0)          |         |
| EAEC + ETEC + EHEC        | 0 (0)                         | 0 (0.0)            | 0 (0.0)          |         |
| EAEC + EIEC + EHEC        | 2 (2.8)                       | 2 (100.0)          | 0 (0.0)          |         |
| ETEC + EIEC + EHEC        | 0 (0)                         | 0 (0.0)            | 0 (0.0)          |         |
|                           |                               |                    |                  |         |
| 4 Pathogens               |                               |                    |                  |         |
| EPEC + EAEC + ETEC + EIEC | 14 (100.0)                    | 13 (92.9)          | 1 (7.1)          | -       |
|                           |                               |                    |                  |         |
